# Supplementary material for: Interfacial processes that modulate the kinetics of lipase-mediated catalysis using porous silica host particles
Source: Royal Society of Chemistry journal article supplement (doi:10.1039/c6ra08934h), 2016-01-01
Supplement: c6ra08934h1.pdf [file c6ra08934h1.pdf]

## Supporting Information

### Interfacial Processes that Modulate the Kinetics of Lipase-Mediated Catalysis using Porous Silica Host Particles

*Paul Joyce<sup>a</sup>, Catherine P. Whitby<sup>b</sup> & Clive A. Prestidge<sup>a,\*</sup>*

<sup>a</sup>School of Pharmacy and Medical Sciences, University of South Australia, City East  
Campus, Adelaide, South Australia 5001, Australia

<sup>b</sup>Institute of Fundamental Sciences, Massey University, Private Bag 11222, Palmerston  
North 4442, New Zealand

\*Corresponding Author. Telephone: +61 8 8302 3569. Fax: +61 8 8302 3683. Email:  
[clive.prestidge@unisa.edu.au](mailto:clive.prestidge@unisa.edu.au)

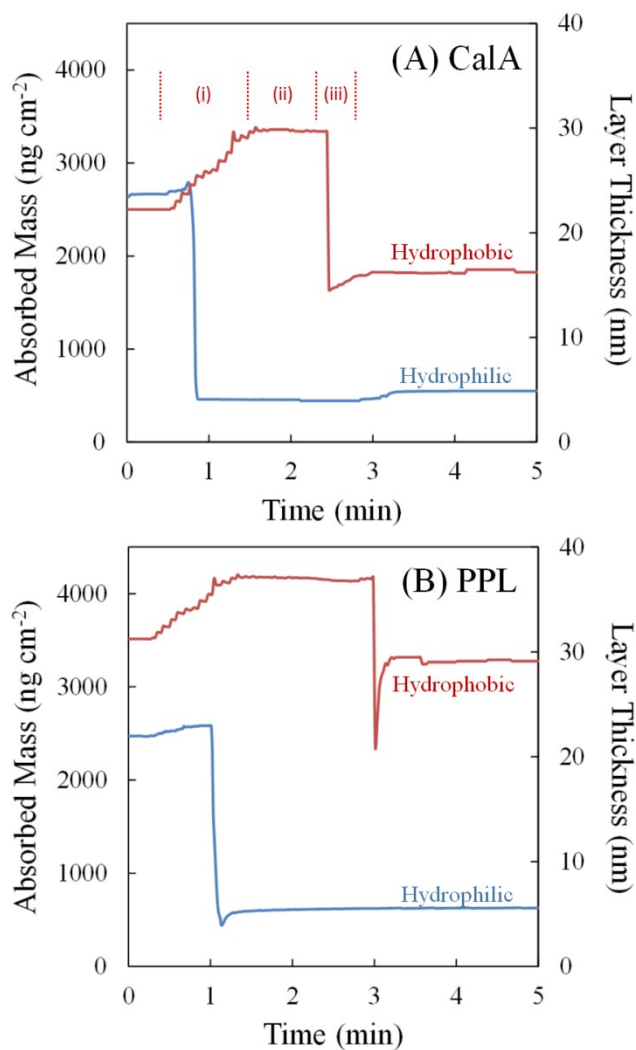

Figure S1: Adsorbed mass (left axis) and layer thickness (right axis) as a function of time during lipase-mediated hydrolysis of a tributyrin film on a hydrophilic (blue line) and hydrophobic surface (red line) for (A) CalA and (B) PPL. Lipase injection occurred at  $t = 0$  min and flow rates remained constant at  $10 \mu\text{g mL}^{-1}$  for all samples. The following phases are labelled for CalA-mediated hydrolysis on hydrophobic silica: (i) lipase adsorption, (ii) accumulation phase whereby digestion products adsorb at lipid-in-water interface, and (iii) mass ejection of digestion products.

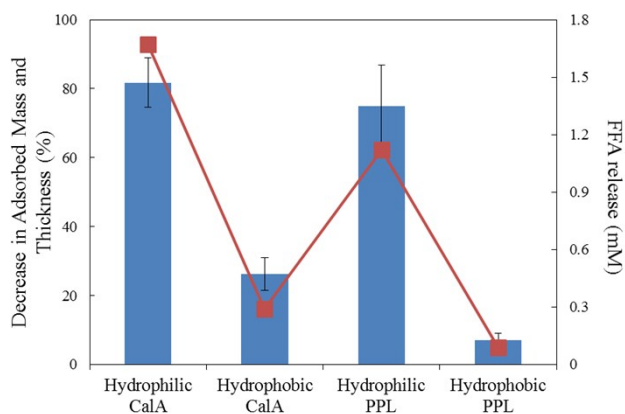

Figure S2: Decrease in adsorbed mass and layer thickness (left axis, blue bars) and FFA concentration in ejection media (right axis, red squares) as a function of silica surface chemistry and lipase extract for the lipase-mediated hydrolysis of a tributyrin film.

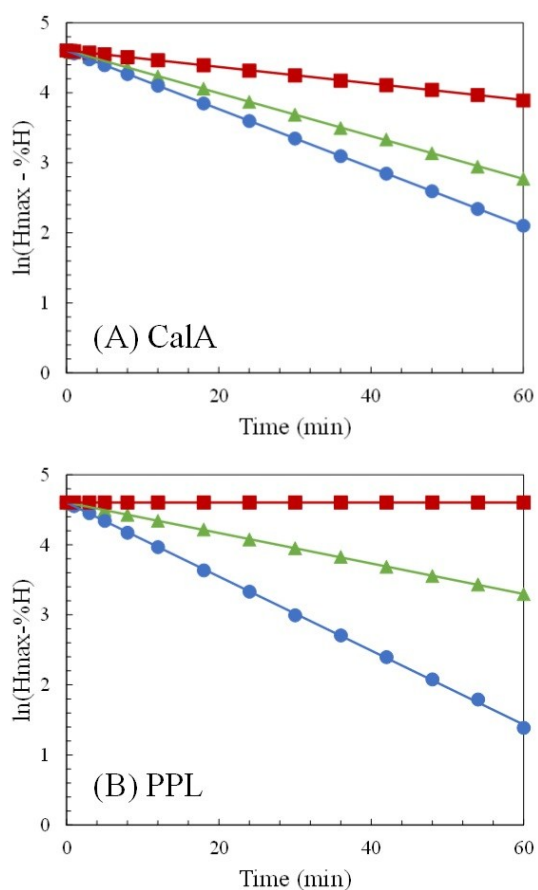

Figure S3: Pseudo-first-order fit for hydrolysis of tributyrin (○) emulsion droplets, (●) loaded in PS-1L and (■) loaded in PS-2L for (A) CalA and (B) PPL.
